# Supplementary material
Source: PubMed Central journal article supplement (PMC7191673)
Supplement: NIHMS1581833-supplement-Supplementary.pdf [file NIHMS1581833-supplement-Supplementary.pdf]

**Supplementary Table I: The variability of reported CL<sub>int</sub> values generated in human hepatocytes.**

| <b><u>Drug</u></b> | <b><u>CL<sub>int</sub> values<br/>(ml/min/kg)</u></b>   | <b><u>References</u></b>          | <b><u>CV (%)</u></b> | <b><u>n</u></b> | <b><u>Largest fold<br/>difference</u></b> |
|--------------------|---------------------------------------------------------|-----------------------------------|----------------------|-----------------|-------------------------------------------|
| Acetaminophen      | 3.59; 2.14;<br>2.76                                     | 3; 17; 20                         | 25.7                 | 3               | 1.68                                      |
| Alprazolam         | 0.263; 1.82                                             | 8; 12                             |                      | 2               | 6.92                                      |
| Caffeine           | 3.21; 3.75;<br>8.83                                     | 3; 14; 16                         | 58.9                 | 3               | 2.75                                      |
| Carvedilol         | 297; 237;<br>196;                                       | 3; 16; 20                         | 21.0                 | 3               | 1.52                                      |
| Chlorpheniramine   | 10.9; 3.89                                              | 16; 20                            |                      | 2               | 2.80                                      |
| Chlorpromazine     | 684; 415;<br>642                                        | 3; 14; 20                         | 24.9                 | 3               | 1.65                                      |
| Cimetidine         | 3.24; 35.1                                              | 16; 20                            |                      | 2               | 10.8                                      |
| Clozapine          | 28.2; 11.0;<br>22.0; 27.9                               | 3; 13; 16;<br>20                  | 36.1                 | 4               | 2.57                                      |
| Codeine            | 63.5; 33.1                                              | 16; 19                            |                      | 2               | 1.92                                      |
| Desipramine        | 62.6; 177;<br>48.2; 53.0                                | 3; 14; 16;<br>20                  | 72.0                 | 4               | 3.67                                      |
| Diazepam           | 5.71; 3.02;<br>24.3; 9.57;<br>6.66; 1.43;<br>6.38; 7.13 | 3; 8; 9; 12;<br>14; 16; 17;<br>20 | 87.6                 | 8               | 17.0                                      |
| Diclofenac         | 89.3; 49.2;<br>296; 128;<br>410; 51.9                   | 3; 9; 10;<br>16; 18; 20           | 86.9                 | 6               | 8.33                                      |
| Diltiazem          | 52.8; 34.2;<br>33.5; 64.2;<br>167; 64.2;<br>48.5        | 3; 13; 14;<br>16; 17; 18;<br>20   | 69.7                 | 7               | 4.99                                      |
| Diphenhydramine    | 22.3; 7.44                                              | 16; 20                            |                      | 2               | 3.00                                      |
| Fenoprofen         | 19.5; 11.4                                              | 3; 20                             |                      | 2               | 1.71                                      |
| Flunitrazepam      | 1.05; 4.80                                              | 8; 12                             |                      | 2               | 4.55                                      |
| Gemfibrozil        | 84.8; 177;<br>66.3; 3.50;<br>44.2                       | 3; 10; 16;<br>19; 20              | 85.9                 | 5               | 50.7                                      |
| Glipizide          | 2.41; 2.68                                              | 3; 20                             |                      | 2               | 1.11                                      |
| Granisetron        | 7.38; 26.6;<br>8.56                                     | 3; 16; 20                         | 75.9                 | 3               | 3.60                                      |
| Ibuprofen          | 21.9; 11.5;<br>65.8; 18.3                               | 3; 14; 18;<br>20                  | 84.1                 | 4               | 5.74                                      |
| Imipramine         | 104; 104;<br>117; 114;<br>94.2                          | 3; 13; 14;<br>16; 20              | 8.53                 | 5               | 1.24                                      |

|                    |                                                                 |                                       |      |   |      |
|--------------------|-----------------------------------------------------------------|---------------------------------------|------|---|------|
| Irbesartan         | 39.1; 17.5;<br>22.7                                             | 3; 13; 20                             | 42.7 | 3 | 2.23 |
| Ketoprofen         | 6.15; 10.7;<br>9.90                                             | 3; 16; 20                             | 27.2 | 3 | 1.74 |
| Lorazepam          | 0.816; 3.02                                                     | 14; 16                                |      | 2 | 3.70 |
| Methylprednisolone | 5.61; 28.6;<br>6.50                                             | 3; 14; 20                             | 96.1 | 3 | 5.11 |
| Metoprolol         | 17.7; 12.3;<br>20.0; 20.0;<br>3.99                              | 3; 13; 16;<br>18; 20                  | 46.0 | 5 | 5.00 |
| Midazolam          | 44.7; 11.1;<br>27.4; 35.3;<br>153; 19.5;<br>16.9; 39.1;<br>39.1 | 3; 8; 9; 11;<br>12; 14; 15;<br>16; 20 | 99.8 | 9 | 13.8 |
| Naloxone           | 105; 167;<br>220; 77.3;<br>596; 589;<br>69.0                    | 3; 10; 11;<br>14; 16; 19;<br>20       | 89.5 | 7 | 8.64 |
| Naproxen           | 14.1; 5.64                                                      | 16; 20                                |      | 2 | 2.50 |
| Nifedipine         | 25.0; 18.2;<br>42.3                                             | 14; 16; 20                            | 43.5 | 3 | 2.32 |
| Omeprazole         | 11.2; 5.02;<br>8.86                                             | 3; 16; 20                             | 37.4 | 3 | 2.24 |
| Ondansetron        | 5.25; 4.09;<br>2.92                                             | 3; 16; 20                             | 28.6 | 3 | 1.80 |
| Oxaprozin          | 4.37; 5.74                                                      | 3; 20                                 |      | 2 | 1.31 |
| Oxazepam           | 9.74; 5.90;<br>9.45                                             | 3; 14; 20                             | 25.5 | 3 | 1.65 |
| Phenacetin         | 13.8; 26.2;<br>5.75; 17.8                                       | 9; 13; 15;<br>20                      | 53.6 | 4 | 4.57 |
| Pindolol           | 5.93; 7.90;<br>5.64                                             | 3; 16; 20                             | 19.0 | 3 | 1.40 |
| Prazosin           | 13.4; 8.20;<br>6.28; 11.7                                       | 3; 13; 16;<br>20                      | 32.7 | 4 | 2.13 |
| Prednisolone       | 4.75; 27.1;<br>13.7                                             | 3; 14; 20                             | 74.1 | 3 | 5.71 |
| Propranolol        | 81.1; 44.8;<br>40.8; 15.9;<br>40.8; 40.8;<br>31.8               | 3; 13; 14;<br>15; 16; 18;<br>20       | 46.6 | 7 | 5.12 |
| Quinidine          | 12.8; 18.1                                                      | 3; 20                                 |      | 2 | 1.41 |
| Ranitidine         | 3.78; 2.70;<br>4.33                                             | 3; 16; 20                             | 22.9 | 3 | 1.60 |
| Ritonavir          | 21.1; 13.8                                                      | 3; 16                                 |      | 2 | 1.52 |

|              |                                        |                          |      |   |      |
|--------------|----------------------------------------|--------------------------|------|---|------|
| Sildenafil   | 37.4; 14.5;<br>22.6                    | 3; 14; 20                | 46.7 | 3 | 2.58 |
| Tenoxicam    | 6.96; 2.68                             | 14; 20                   |      | 2 | 2.60 |
| Theophylline | 2.68; 1.39                             | 3; 14                    |      | 2 | 1.92 |
| Timolol      | 7.99; 11.7                             | 3; 20                    |      | 2 | 1.46 |
| Tolbutamide  | 2.17; 4.95;<br>7.42; 3.40              | 3; 14; 18;<br>20         | 50.5 | 4 | 3.43 |
| Triazolam    | 1.34; 10.3;<br>2.82                    | 8; 11; 16                | 99.4 | 3 | 7.64 |
| Verapamil    | 114; 54.3;<br>79.0; 88.9;<br>237; 64.2 | 3; 13; 14;<br>16; 18; 20 | 66.4 | 6 | 4.36 |
| Zolpidem     | 9.85; 8.36                             | 3; 20                    |      | 2 | 1.18 |
